# Supplementary material for: Confirmation Using Triple Quadrupole and High-Resolution Mass Spectrometry of a Fatal Canine Neurotoxicosis following Exposure to Anatoxins at an Inland Reservoir
Source: MDPI journal article supplement (doi:10.3390/toxins14110804), 2022-11-18

Supplementary File

## Confirmation Using Triple Quadrupole and High-Resolution Mass Spectrometry of a Fatal Canine Neurotoxicosis following Exposure to Anatoxins at an Inland Reservoir

Andrew D. Turner \*, Florence R. I. Turner, Martha White, David Hartnell, Claire G. Crompton, Nicola Bates, Jan Egginton, Liz Branscombe, Adam M. Lewis and Benjamin H. Maskrey

\* Correspondence: author: andrew.turner@cefas.co.uk; Tel.: +44-(0)1305-206636

Supplementary Figure S1. Product ion spectra of minor anatoxin analogues determined by LC-HRMS analysis

(A) 4-keto-ATX –  $m/z$  180.1019. 5.53 mins

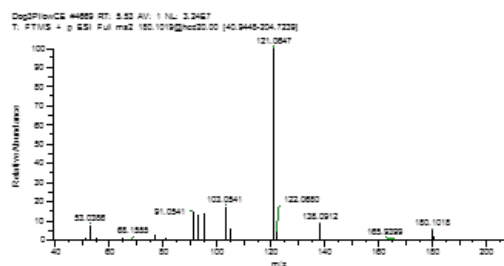

(B) epoxy ATX –  $m/z$  182.1176. 2.20 mins

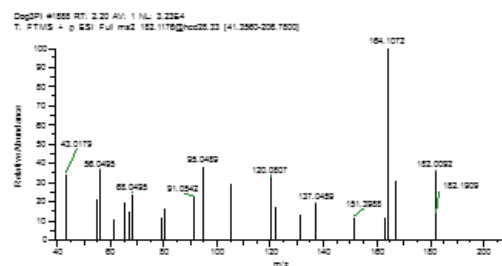

(C) 4-keto-HTX –  $m/z$  194.1176

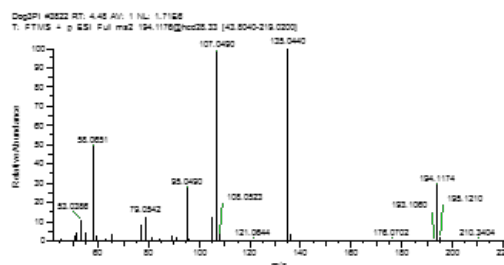

(D) epoxy-HTX –  $m/z$  196.1332. 6.22 mins

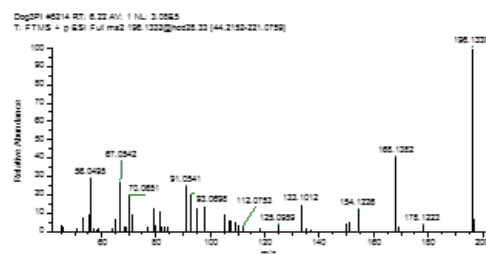

Supplement: s1 [file s1]
